# Supplementary material for: Myosins XI-K, XI-1, and XI-2 are required for development of pavement cells, trichomes, and stigmatic papillae in Arabidopsis
Source: PubMed Central journal article supplement (PMC3424107; doi:10.1186/1471-2229-12-81), 2012-06-06
Supplement: 1471-2229-12-81-S2.pdf [file 1471-2229-12-81-S2.pdf]

**Additional file 2**

Data for Figure 2B: size of the five-week-old rosette leaves (from 5th to 10th; mm).

|                        | MEAN  | MEDIAN | STDEV | SEM  | n  | Repeated Measures ANOVA | Dunn's test WT versus: | %   |
|------------------------|-------|--------|-------|------|----|-------------------------|------------------------|-----|
| <b>petiole length</b>  |       |        |       |      |    | P<0.0001                |                        |     |
| <b>WT</b>              | 14.78 | 15.07  | 2.07  | 0.49 | 18 |                         |                        | 100 |
| <i>xi-2/xi-k</i>       | 11.26 | 10.75  | 1.75  | 0.41 | 18 |                         | P<0.01                 | 76  |
| <i>xi-1/xi-2//xi-k</i> | 8.84  | 9.10   | 1.26  | 0.30 | 18 |                         | P<0.01                 | 60  |
| <b>blade length</b>    |       |        |       |      |    | P<0.0001                |                        |     |
| <b>WT</b>              | 20.87 | 21.17  | 2.51  | 0.59 | 18 |                         |                        | 100 |
| <i>xi-2/xi-k</i>       | 20.17 | 20.73  | 2.56  | 0.60 | 18 |                         | P>0.05                 | 97  |
| <i>xi-1/xi-2//xi-k</i> | 16.58 | 17.30  | 2.16  | 0.51 | 18 |                         | P<0.01                 | 79  |
| <b>blade width</b>     |       |        |       |      |    | P<0.0001                |                        |     |
| <b>WT</b>              | 9.55  | 9.27   | 1.07  | 0.25 | 18 |                         |                        | 100 |
| <i>xi-2/xi-k</i>       | 10.80 | 10.87  | 0.71  | 0.17 | 18 |                         | P<0.01                 | 113 |
| <i>xi-1/xi-2//xi-k</i> | 9.48  | 9.57   | 0.82  | 0.19 | 18 |                         | P>0.05                 | 99  |

Abbreviations: STDEV, standard deviation; SEM, standard error of the mean; n, number of data points.

Statistical analysis: Repeated Measures ANOVA and Dunn's Multiple Comparisons Test.

%: mean values of the wild type (WT) were arbitrarily set at 100% and compared to the mean values of the mutants.
