# Supplementary material for: Myosins XI-K, XI-1, and XI-2 are required for development of pavement cells, trichomes, and stigmatic papillae in Arabidopsis
Source: PubMed Central journal article supplement (PMC3424107; doi:10.1186/1471-2229-12-81), 2012-06-06
Supplement: 1471-2229-12-81-S8.pdf [file 1471-2229-12-81-S8.pdf]

**Additional file 8**

Data for Figure 3B: length ratios of the trichome stalk and branches.

|                       | MEAN | MEDIAN | STDEV | SEM  | n   | Kruskal Wallis test | Dunn's test<br>WT versus: |
|-----------------------|------|--------|-------|------|-----|---------------------|---------------------------|
| <b>*BR/stalk</b>      |      |        |       |      |     | P<0.0001            |                           |
| <b>WT</b>             | 2.37 | 2.29   | 0.49  | 0.05 | 97  |                     |                           |
| <i>xi-1</i>           | 2.76 | 2.71   | 0.57  | 0.06 | 94  |                     | P<0.05                    |
| <i>xi-2</i>           | 2.43 | 2.39   | 0.47  | 0.04 | 109 |                     | P>0.05                    |
| <i>xi-k</i>           | 2.06 | 2.06   | 0.37  | 0.04 | 96  |                     | P<0.05                    |
| <i>xi-1/xi-2</i>      | 2.60 | 2.55   | 0.52  | 0.05 | 80  |                     | P>0.05                    |
| <i>xi-1/xi-k</i>      | 1.48 | 1.43   | 0.35  | 0.03 | 108 |                     | P<0.001                   |
| <i>xi-2/xi-k</i>      | 1.25 | 1.18   | 0.50  | 0.05 | 108 |                     | P<0.001                   |
| <i>xi-1/xi-2/xi-k</i> | 1.00 | 0.86   | 0.60  | 0.07 | 73  |                     | P<0.001                   |

Abbreviations: BR, trichome branch; STDEV, standard deviation; SEM, standard error of the mean; n, number of data points.

\* BR/stalk ratio: average length of trichome branches (BR1, BR2, BR3) divided with the length of the stalk.

Statistical analysis: Kruskal-Wallis Test and Dunn's Multiple Comparisons Test.
